# Supplementary material for: More rapid intensification of flash droughts with shorter onset timescales
Source: Research Square preprint supplement (doi:10.21203/rs.3.rs-267288/v1), 2021-03-10
Supplement: Supplementary file 1 [file b4aa2128ddc99afb5b41e247.docx]

Supporting Information for

**More rapid intensification of flash droughts with shorter onset timescales**

Y. Qing1, S. Wang1,2,*, B. C. Ancell3, and Z. L. Yang4

1. Department of Land Surveying and Geo-Informatics, The Hong Kong Polytechnic University, Hong Kong, China
2. The Hong Kong Polytechnic University Shenzhen Research Institute, Shenzhen, China
3. Department of Geosciences, Texas Tech University, Lubbock, TX, USA
4. Department of Geological Sciences, The John A. and Katherine G. Jackson School of Geosciences, University of Texas at Austin, Austin, TX, USA

*Corresponding author: Shuo Wang (shuo.s.wang@polyu.edu.hk)

**List of Table Captions**

**Table 1**. List of regions used in this study (only land grid points are used in the analysis).

**List of Figure Captions**

**Fig. 1** **a-e** The proportions of flash droughts that last for different pentads among all flash droughts. **f-j** The mean intensification rates of flash droughts that last for different pentads.

**Fig. 2** The percentage of flash droughts developing at different lead times among all flash droughts over different regions.

**Fig. 3** Global distribution of cropland.

**Fig. 4** Comparison of the percentages of areas with upward and downward trends across different regions of the world.

**Fig. 5** Temporal evolution of the annual percentages of flash droughts developing at different pentads among all flash drought events over different regions of the world (AUS is not shown because the number of flash drought events is too small to carry out statistical significance tests).

**Fig. 6** Distributions of the percentages of flash droughts among all drought events across different regions of the world.

**Fig. 7** Temporal evolution of the annual percentages of flash droughts among all drought events over different regions of the world (AUS is not shown because the number of flash drought events is too small to carry out statistical significance tests).

**Fig. 8** Distributions of the frequencies of flash droughts identified by different thresholds of soil moisture.

**Fig. 9** Distributions of the frequencies of flash droughts identified based on different soil layers.

**Fig. 10** Spatial distribution of all droughts around the world.

**Fig. 11** The percentage of pentads for flash droughts on average per month, derived from each land surface model and the multi-model ensemble mean. The frequency of occurrence (FOC) is defined as the percentage of pentads for flash droughts (*N*/*N*total) for each grid point.

**Fig. 12** Variations in soil moisture percentiles for flash drought events at 1-, 2-, 3-, 4-, 5-pentad lead times of all grid points. The two red dashed lines represent the wet (high SM percentile of the 40th percentile) and the dry (low SM percentile of the 20th percentile) SM conditions, respectively.

**Table 1** List of regions used in this study (only land grid points are used in the analysis).

| Name | Acronym | Latitude (°) | Longitude (°) |
| --- | --- | --- | --- |
| Australia | AUS | 45S-11S | 110E-155E |
| Amazon Basin | AMZ | 20S-12N | 82W-34W |
| Southern South America | SSA | 56S-20S | 76W-40W |
| Central America | CAM | 10N-30N | 116W-83W |
| Western North America | WNA | 30N-60N | 130W-103W |
| Central North America | CNA | 30N-50N | 103W-85W |
| Eastern North America | ENA | 25N-50N | 85W-60W |
| Alaska | ALA | 60N-72N | 170W-103W |
| Greenland | GRL | 50N-85N | 103W-10W |
| Mediterranean Basin | MED | 30N-48N | 10W-40E |
| Northern Europe | NEU | 48N-75N | 10W-40E |
| Western Africa | WAF | 12S-18N | 20W-22E |
| Eastern Africa | EAF | 12S-18N | 22E-52E |
| Southern Africa | SAF | 35S-12S | 10W-52E |
| Sahara | SAH | 18N-30N | 20W-65E |
| Southeast Asia | SEA | 11S-20N | 95E-155E |
| East Asia | EAS | 20N-50N | 100E-145E |
| South Asia | SAS | 5N-30N | 65E-100E |
| Central Asia | CAS | 30N-50N | 40E-75E |
| Tibet | TIB | 30N-50N | 75E-100E |
| North Asia | NAS | 50N-70N | 40E-180E |


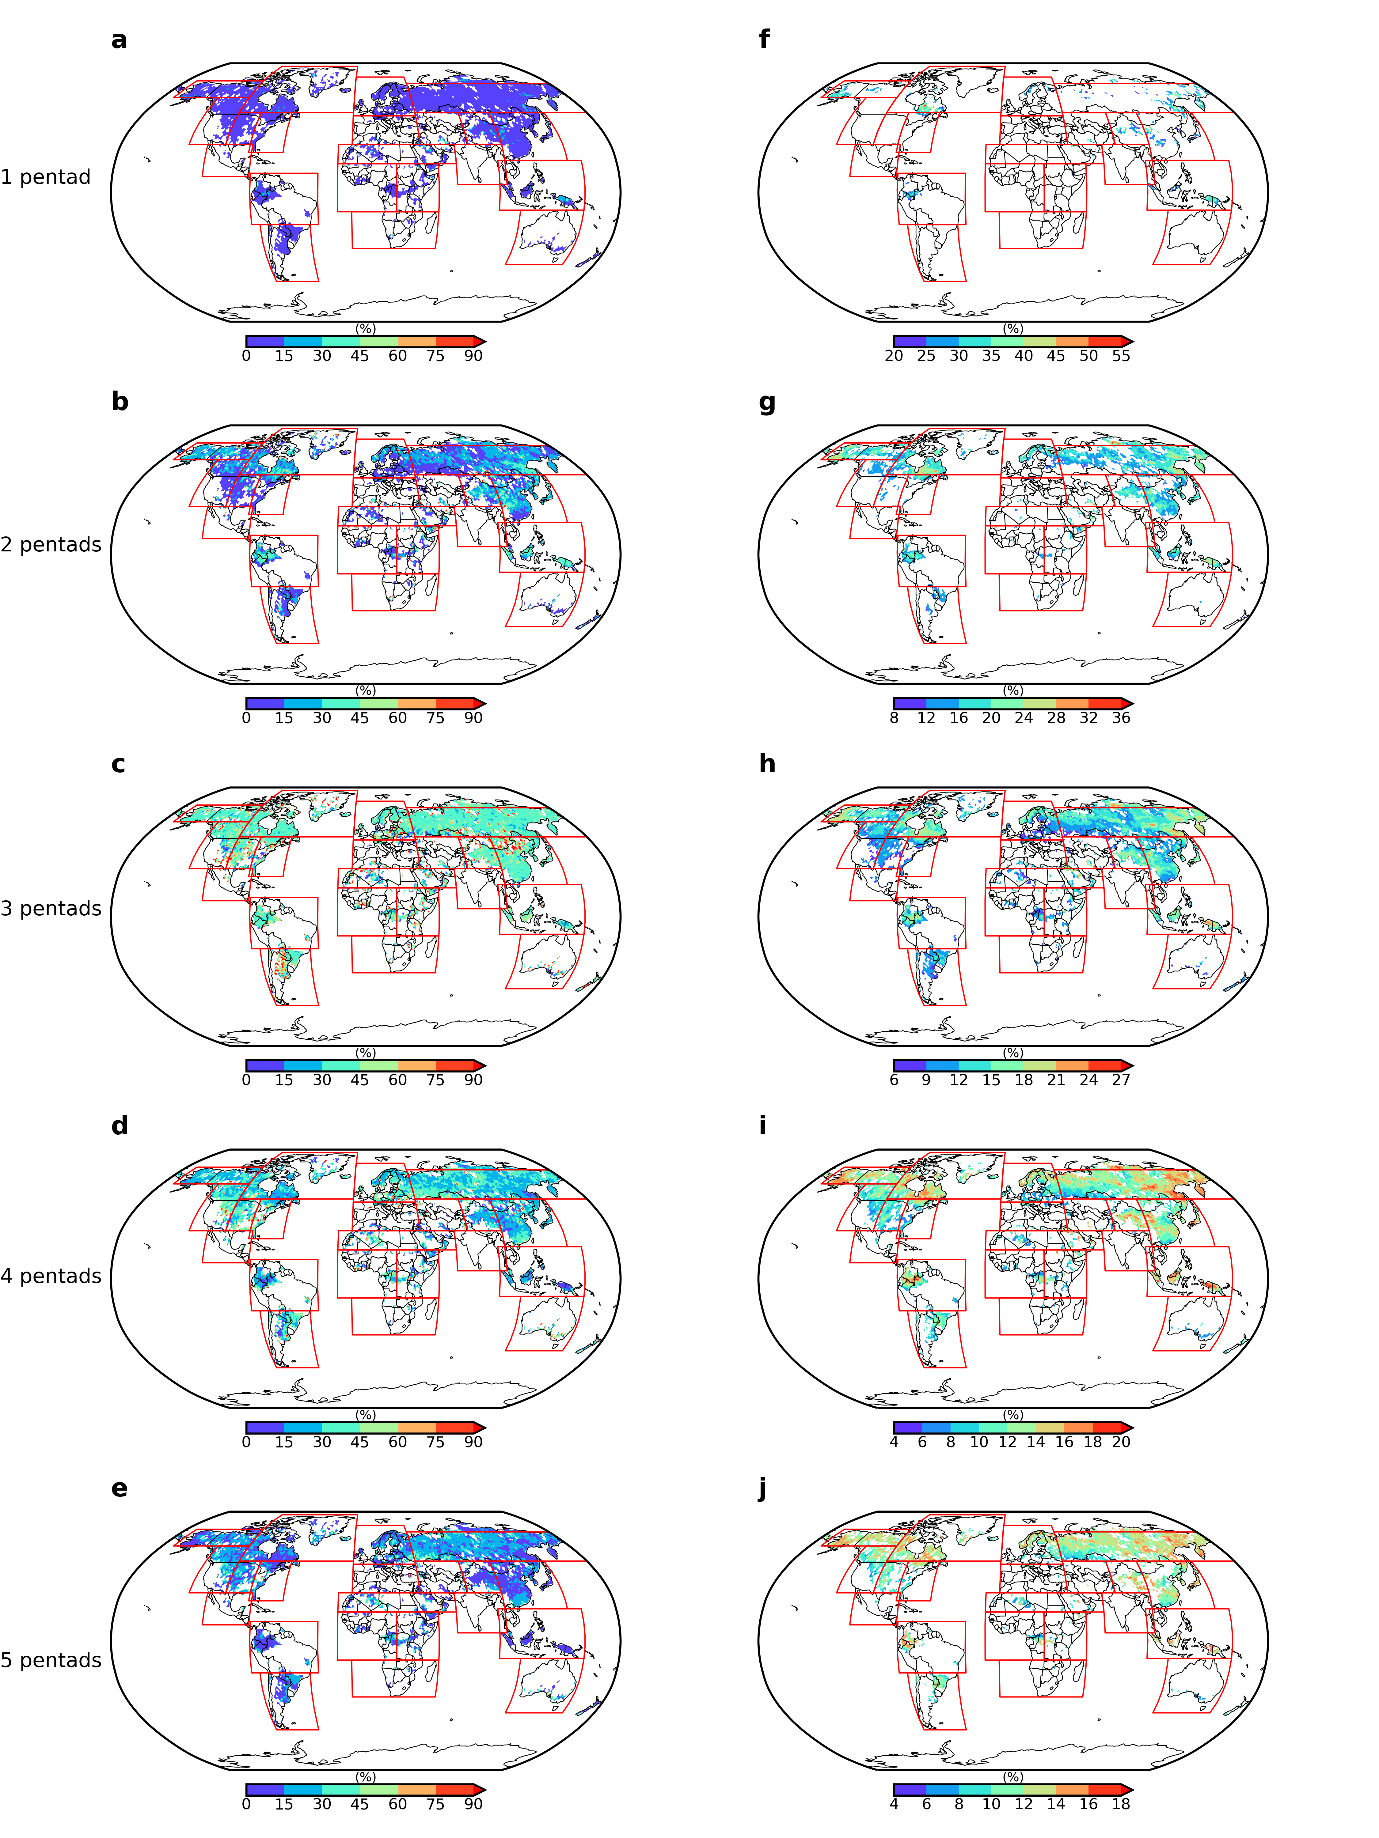


**Fig. 1** **a-e** The proportions of flash droughts that last for different pentads among all flash droughts. **f-j** The mean intensification rates of flash droughts that last for different pentads.


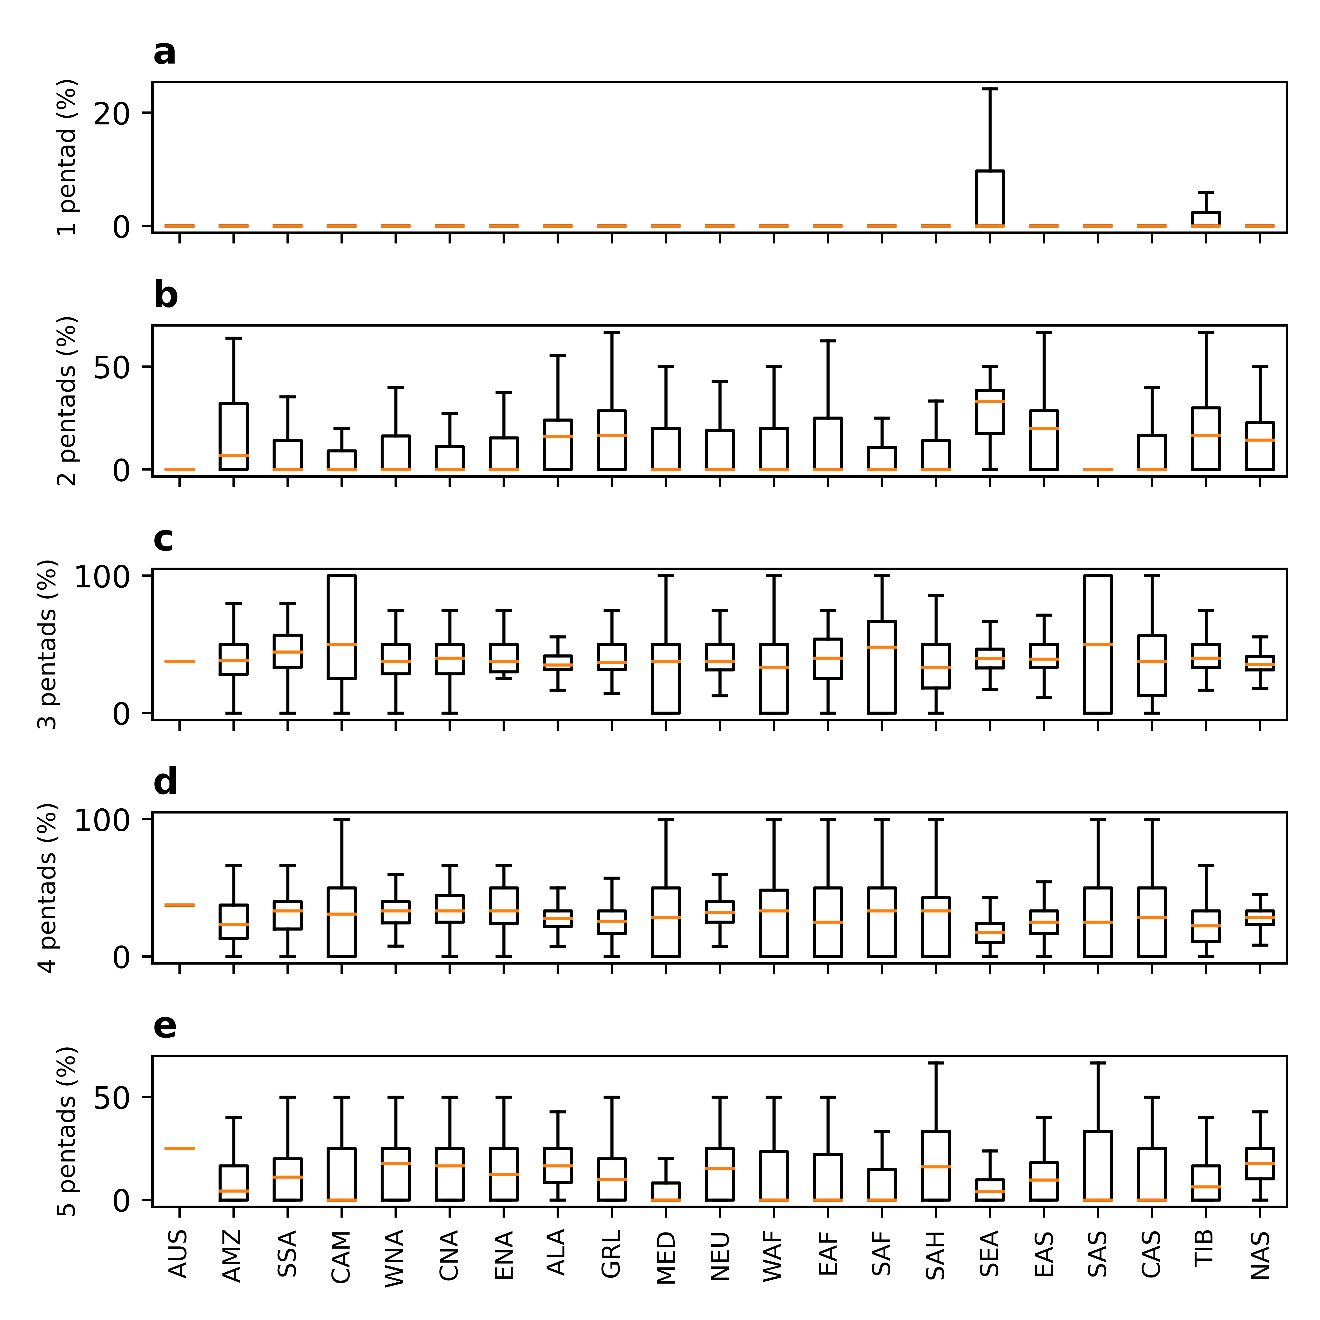


**Fig. 2** The percentage of flash droughts developing at different lead times among all flash droughts over different regions.


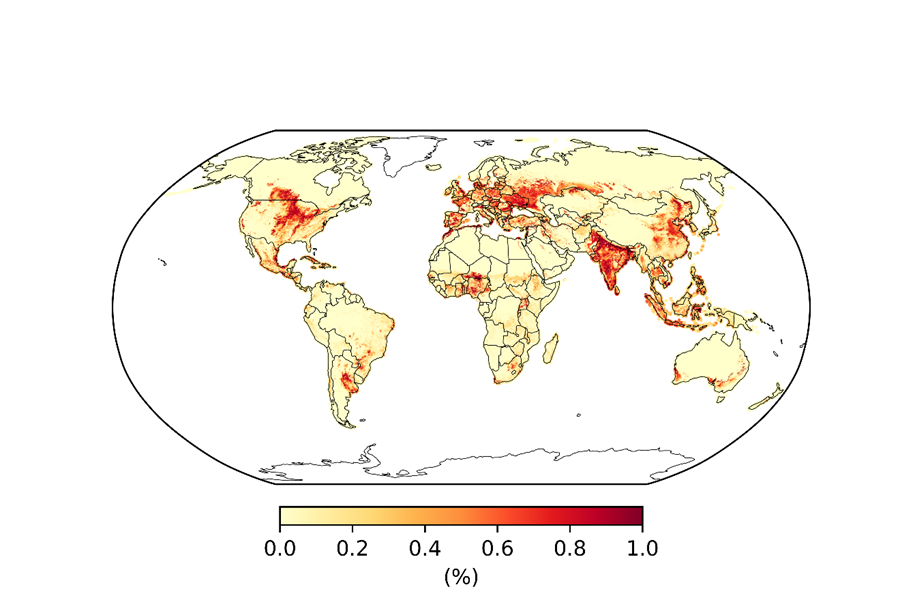


**Fig. 3** Global distribution of cropland.


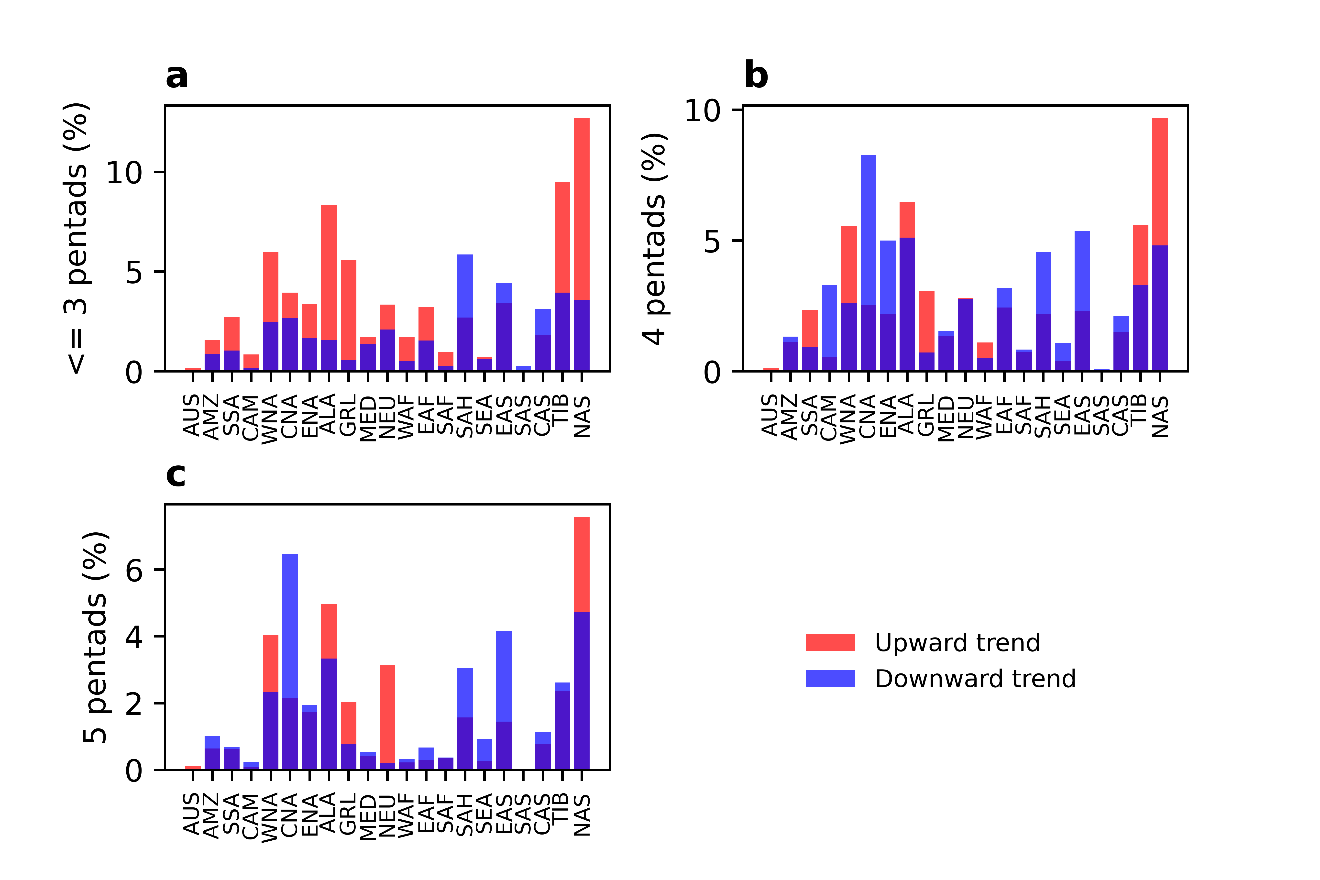


**Fig. 4** Comparison of the percentages of areas with upward and downward trends across different regions of the world.


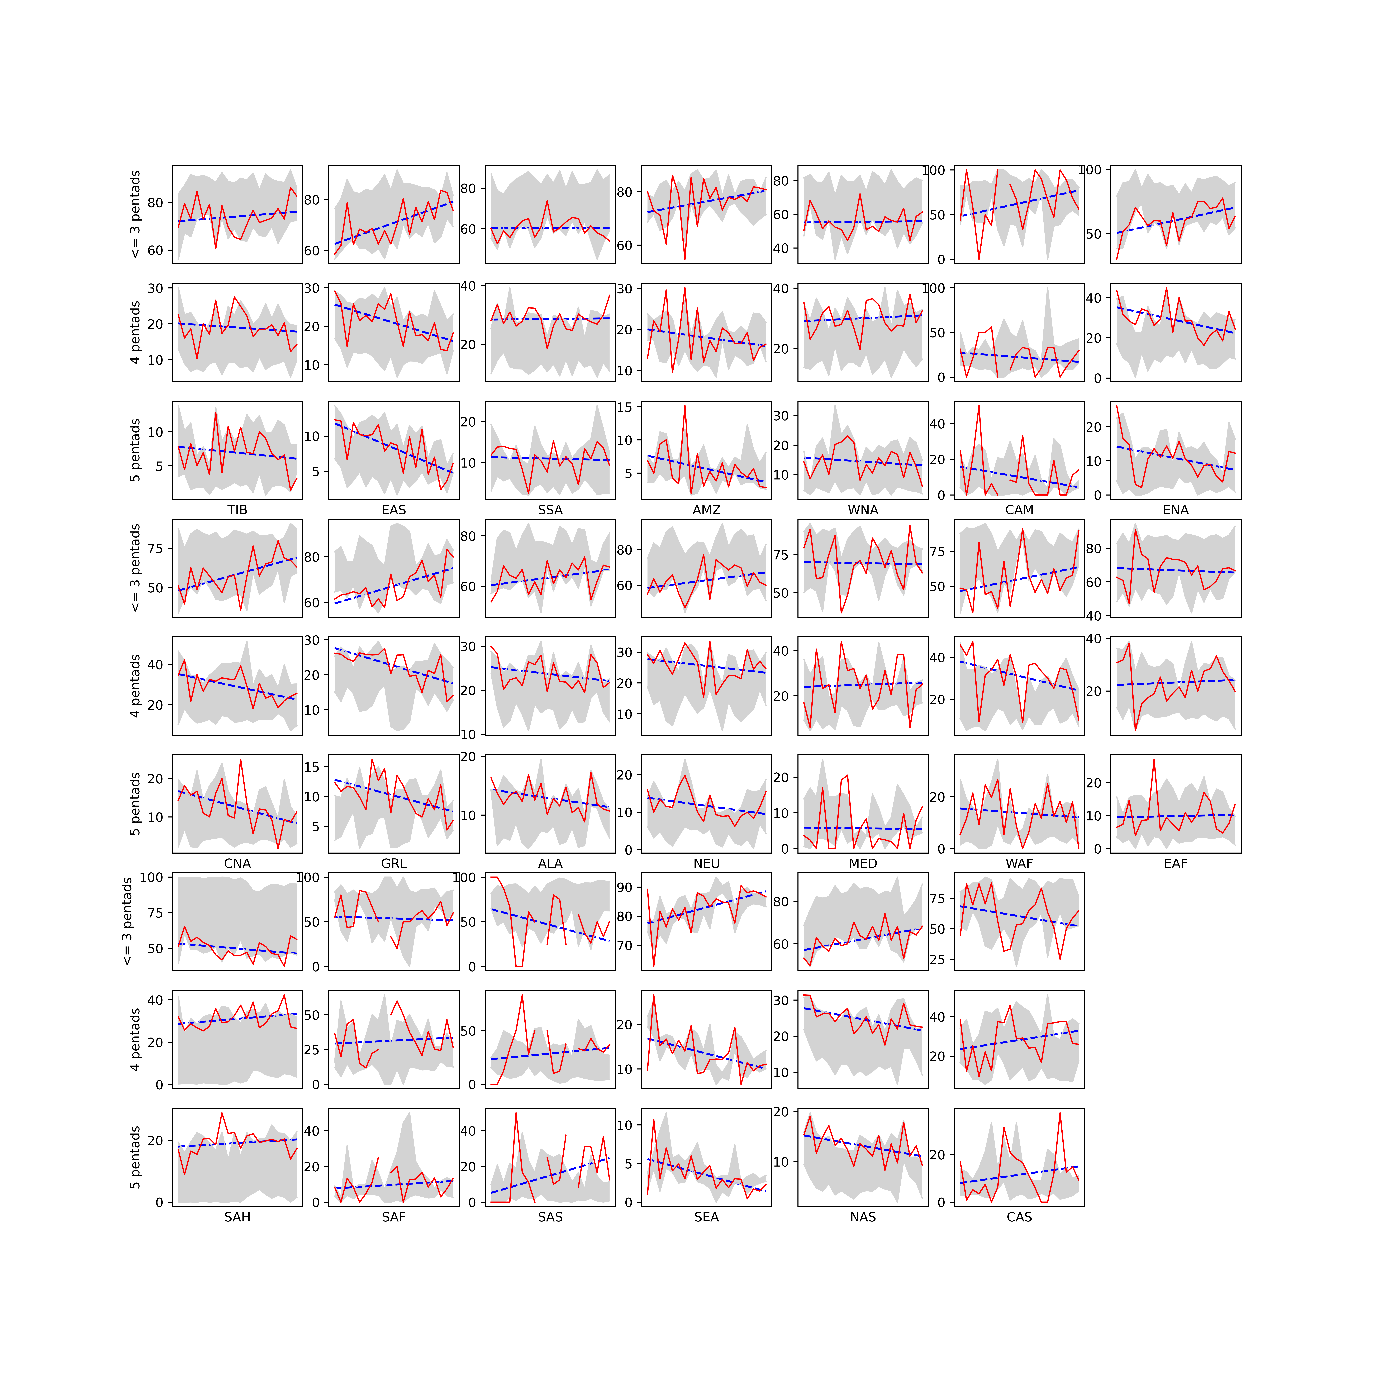


**Fig. 5** Temporal evolution of the annual percentages of flash droughts developing at different pentads among all flash drought events over different regions of the world (AUS is not shown because the number of flash drought events is too small to carry out statistical significance tests).


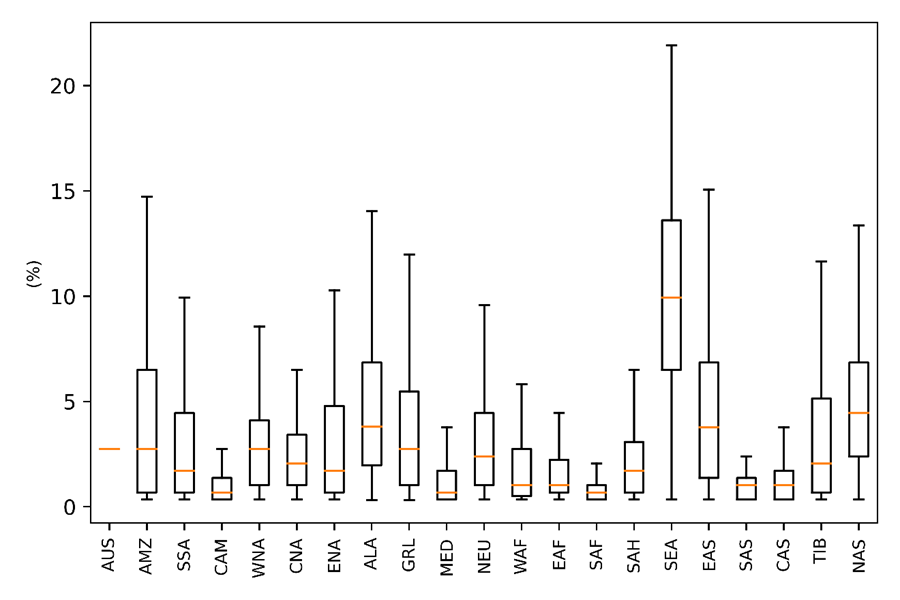


**Fig. 6** Distributions of the percentages of flash droughts among all drought events across different regions of the world.


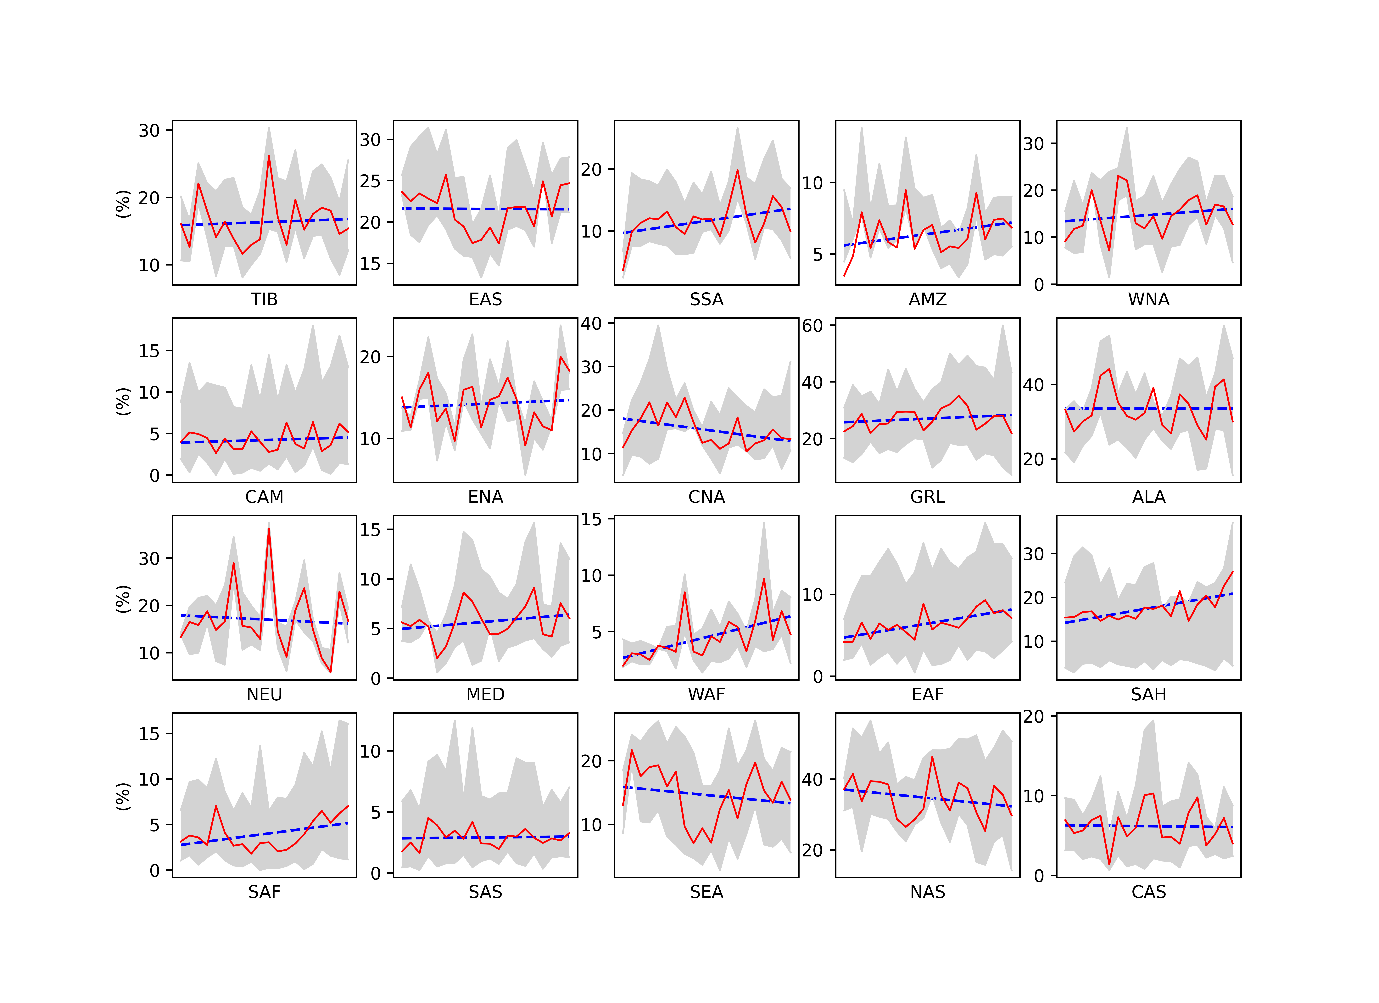


**Fig. 7** Temporal evolution of the annual percentages of flash droughts among all drought events over different regions of the world (AUS is not shown because the number of flash drought events is too small to carry out statistical significance tests).


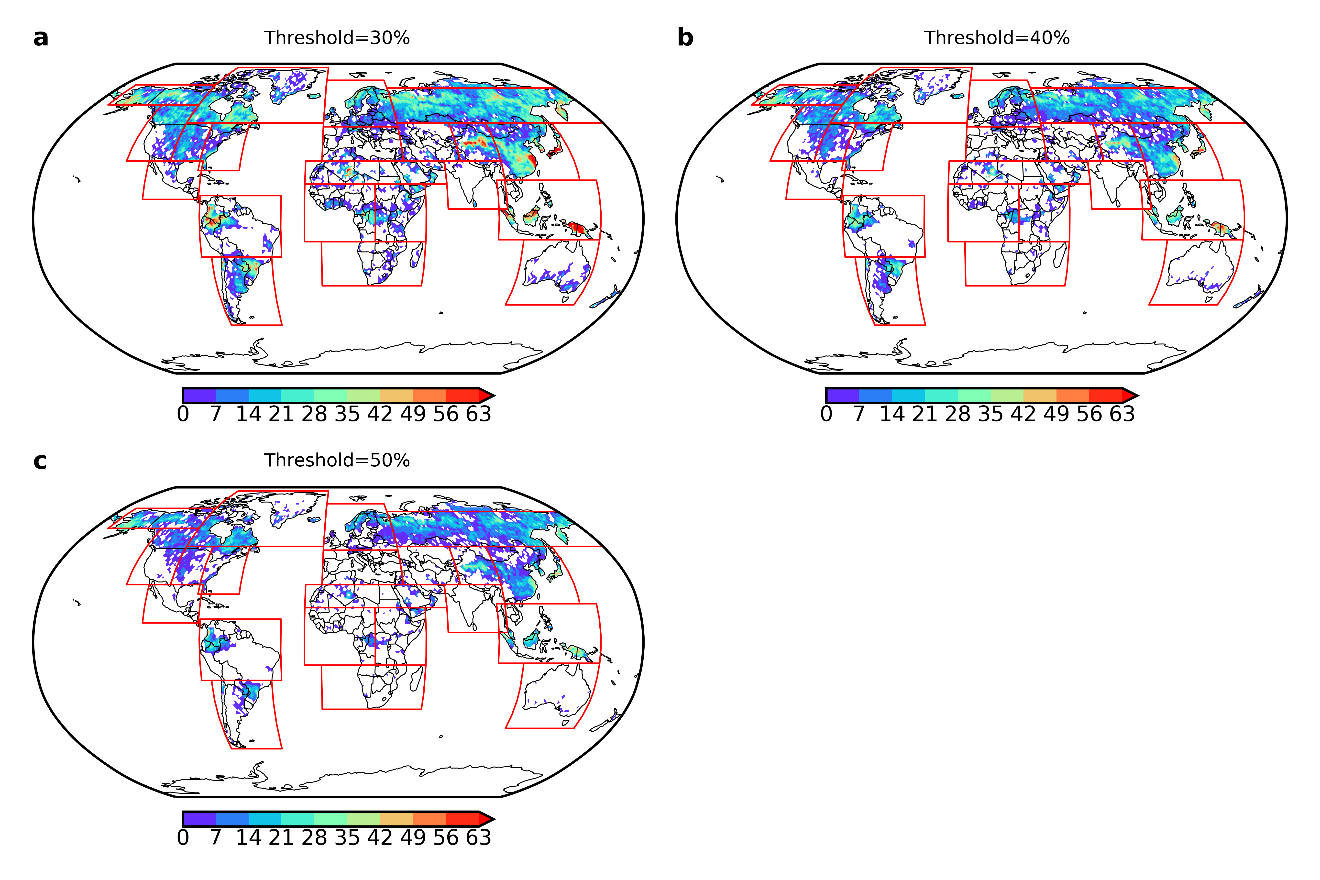


**Fig. 8** Distributions of the frequencies of flash droughts identified by different thresholds of soil moisture.


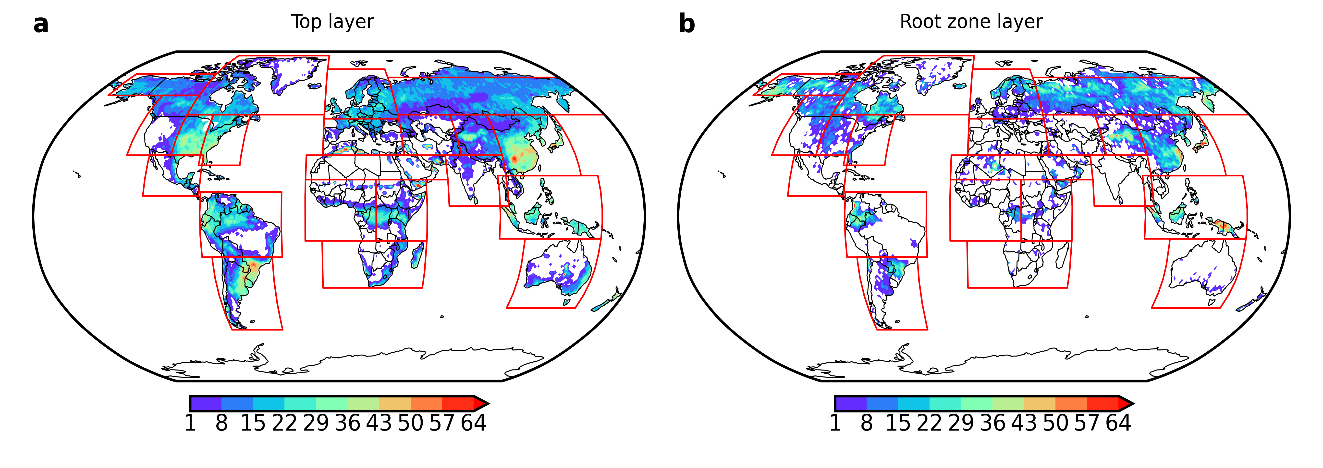


**Fig. 9** Distributions of the frequencies of flash droughts identified based on different soil layers.


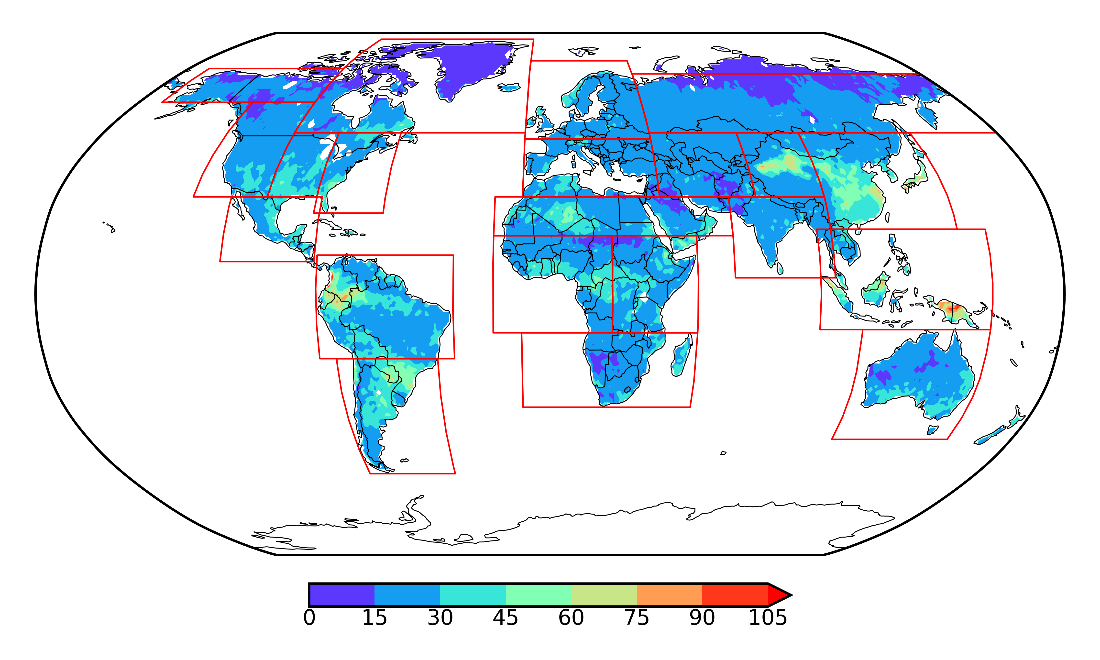


**Fig. 10** Spatial distribution of all droughts around the world.


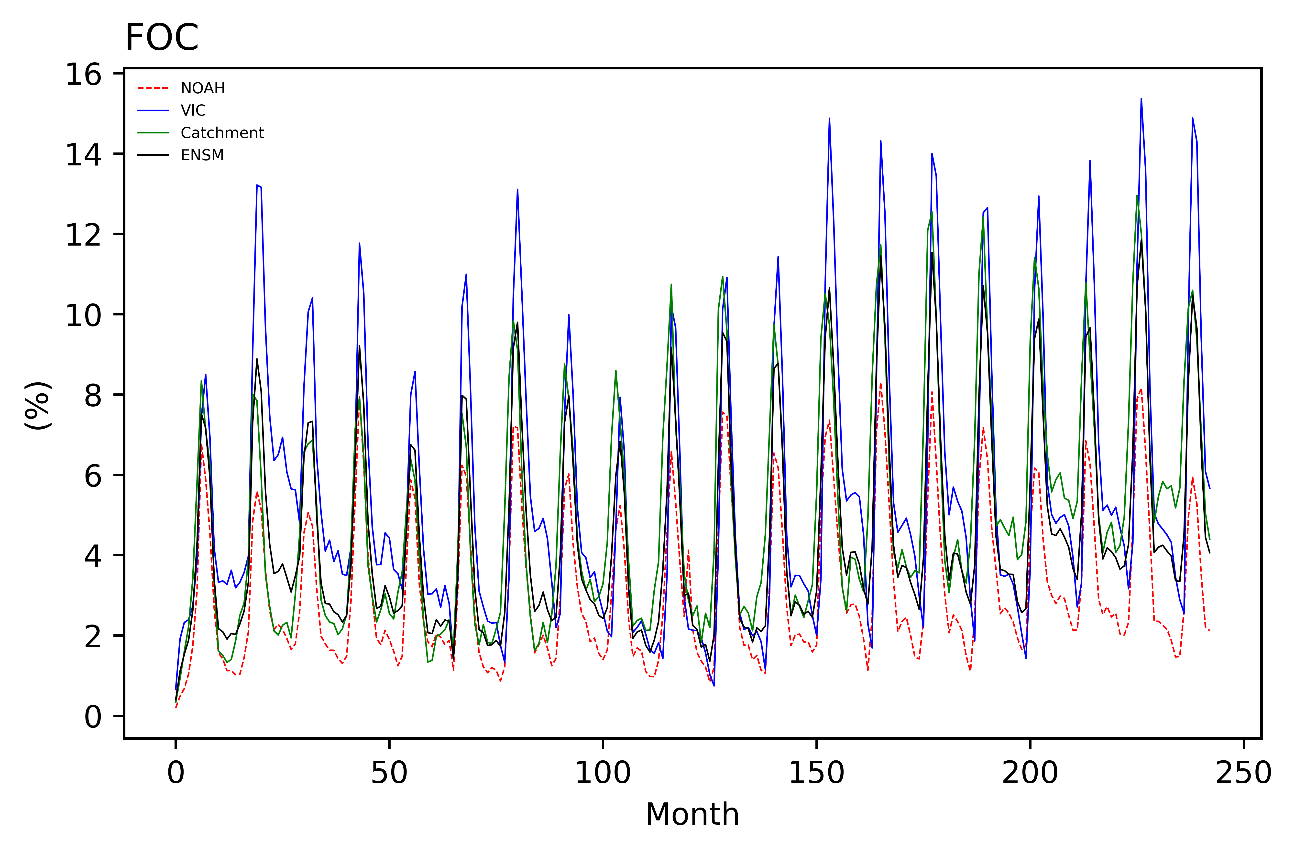


**Fig. 11** The percentage of pentads for flash droughts on average per month, derived from each land surface model and the multi-model ensemble mean. The frequency of occurrence (FOC) is defined as the percentage of pentads for flash droughts (*N*/*N*total) for each grid point.


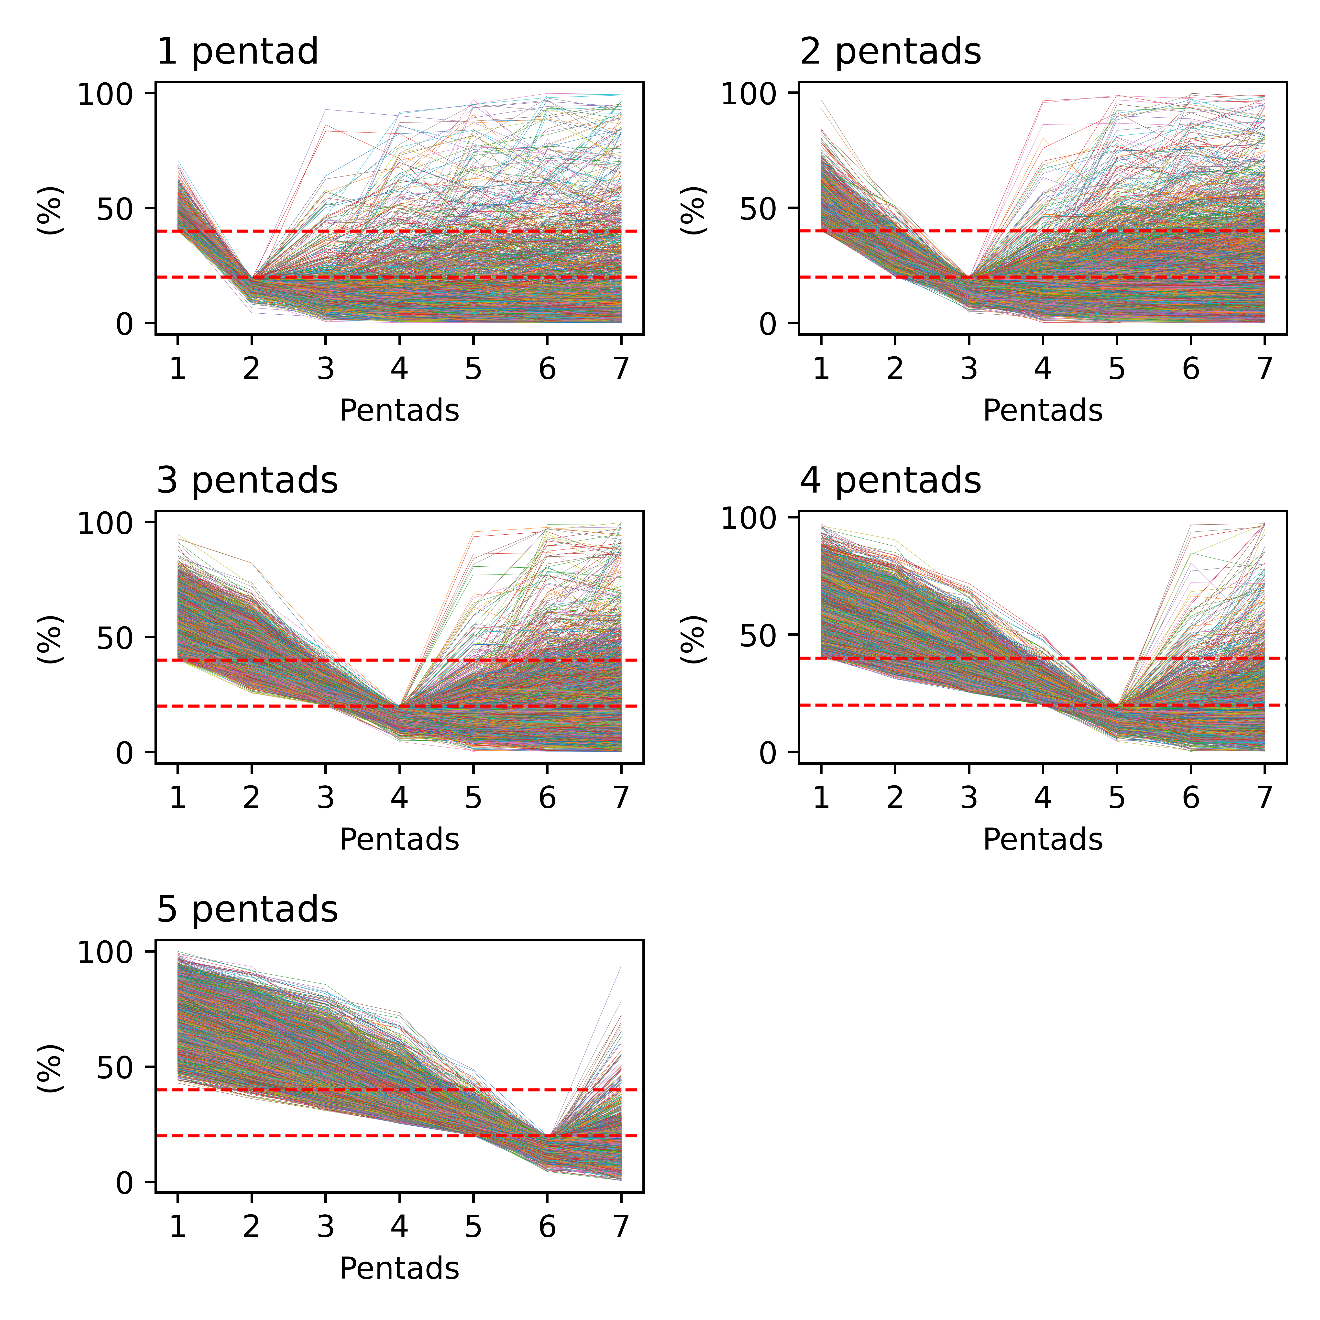


**Fig. 12** Variations in soil moisture percentiles for flash drought events at 1-, 2-, 3-, 4-, 5-pentad lead times of all grid points. The two red dashed lines represent the wet (high SM percentile of the 40th percentile) and the dry (low SM percentile of the 20th percentile) SM conditions, respectively.
